# Supplementary material
Source: PubMed Central journal article supplement (PMC4221213)
Supplement: supp_nst168_scan-12-204-File001.pdf [file supp_nst168_scan-12-204-File001.pdf]

## Supplementary Materials

Table 4: Choice and Order Regions

| Region                                                                               | Talairach Coordinates                |     |     | z-score | Clusterwise p-value |
|--------------------------------------------------------------------------------------|--------------------------------------|-----|-----|---------|---------------------|
|                                                                                      | X                                    | Y   | Z   |         |                     |
| <b>Interval 1</b>                                                                    | <b>Yes&gt;No (Collapsed)</b>         |     |     |         |                     |
| R/L Rostral ACC                                                                      | -4                                   | 36  | -4  | 4.31    | 0.0355              |
| L Fusiform                                                                           | -42                                  | -50 | -17 | 3.68    | 0.0118              |
| L Inferior Parietal Cortex                                                           | -34                                  | -67 | 41  | 3.61    | 0.0001              |
| L Pars Opercularis                                                                   | -50                                  | 14  | 26  | 3.37    | 0.0336              |
| <b>Interval 1</b>                                                                    | <b>Yes&gt;No Face First</b>          |     |     |         |                     |
| R/L Caudal ACC                                                                       | -4                                   | 10  | 21  | 5.11    | <0.0001             |
| R/L Medial OFC                                                                       | 8                                    | 24  | -10 | 4.48    | <0.0001             |
| R Caudal MFG                                                                         | 38                                   | 3   | 49  | 4.38    | 0.0185              |
| L Rostral MFG                                                                        | -36                                  | 29  | 18  | 4.36    | 0.0001              |
| L Cerebellum                                                                         | -38                                  | -40 | -36 | 4.29    | 0.0045              |
| L Superior Parietal                                                                  | -8                                   | -61 | 50  | 4.28    | <0.0001             |
| R Superior Temporal Gyrus                                                            | 55                                   | 4   | -16 | 4.1     | 0.025               |
| R Supramarginal Gyrus                                                                | 67                                   | -35 | 16  | 4.05    | 0.0149              |
| L Superior Parietal                                                                  | -30                                  | -56 | 35  | 3.84    | <0.0001             |
| L Caudal MFG                                                                         | -34                                  | -5  | 40  | 3.79    | 0.0014              |
| L Superior Temporal Sulcus                                                           | -67                                  | -33 | 19  | 3.77    | 0.0299              |
| R Posterior CC                                                                       | -12                                  | -42 | 0   | 3.76    | 0.009               |
| L Precentral Gyrus                                                                   | -50                                  | 8   | 19  | 3.71    | 0.0016              |
| R Lateral Occipital                                                                  | 24                                   | -87 | 24  | 3.69    | 0.0024              |
| R Cerebellum                                                                         | 16                                   | -77 | -14 | 3.49    | 0.0373              |
| <b>Interval 1</b>                                                                    | <b>Yes&gt;No Compatibility First</b> |     |     |         |                     |
| n/a                                                                                  |                                      |     |     |         |                     |
| <b>Interval 2</b>                                                                    | <b>Yes&gt;No (Collapsed)</b>         |     |     |         |                     |
| R/L Superior Frontal, Rostral ACC, Medial OFC, Ventral Striatum, Thalamus, Brainstem | 6                                    | 15  | 15  | 5.25    | <0.0001             |
| R/L PCC                                                                              | 2                                    | -24 | 35  | 5.17    | <0.0001             |
| L Lateral OFC, Anterior Insula                                                       | -38                                  | 33  | -19 | 5.06    | <0.0001             |
| R Cerebellum                                                                         | 6                                    | -66 | -18 | 4.84    | 0.0001              |
| R Precentral Gyrus                                                                   | 42                                   | 8   | 24  | 4.46    | 0.0162              |
| R Cerebellum                                                                         | 38                                   | -63 | -40 | 4.29    | <0.0001             |
| L Lateral Occipital                                                                  | -24                                  | -80 | 12  | 4.27    | <0.0001             |
| R Anterior Insula                                                                    | 40                                   | 24  | -10 | 4.02    | <0.0001             |
| L Cerebellum                                                                         | -32                                  | -52 | -18 | 3.89    | 0.0154              |
| L Rostral MFG                                                                        | -44                                  | 44  | 4   | 3.81    | 0.0005              |
| R Cerebellum                                                                         | 18                                   | -76 | -19 | 3.76    | <0.0001             |
| R Superior Parietal                                                                  | 30                                   | -69 | 32  | 3.65    | 0.0059              |

**Interval 2                    Yes>No Face First**

|                                   |     |     |     |      |         |
|-----------------------------------|-----|-----|-----|------|---------|
| R/L Rostral ACC, Superior Frontal | -4  | 22  | 27  | 4.39 | <0.0001 |
| L Rostral ACC                     | -10 | 35  | 14  | 4.24 | 0.0011  |
| R Cerebellum                      | 42  | -63 | -41 | 4.16 | 0.0157  |
| L Lateral OFC                     | -24 | 20  | -17 | 4.12 | 0.0037  |
| R/L Brainstem                     | 0   | -36 | 3   | 4.1  | 0.0103  |
| L Cerebellum                      | -32 | -58 | -23 | 4.03 | <0.0001 |
| L Caudate/Thalamus                | -2  | -12 | 11  | 3.87 | <0.0001 |
| R/L PCC                           | 2   | -21 | 28  | 3.75 | 0.0319  |

**Interval 2                    Yes>No Compatibility First**

|                                               |     |     |     |      |         |
|-----------------------------------------------|-----|-----|-----|------|---------|
| R/L Medial OFC, Rostral ACC, Superior Frontal | -20 | 28  | 35  | 5.32 | <0.0001 |
| R/L Ventral Striatum, R/L Thalamus            | 0   | -16 | 4   | 5.16 | <0.0001 |
| R/L PCC                                       | 0   | -32 | 36  | 4.77 | <0.0001 |
| L Lateral Occipital                           | -34 | -92 | -3  | 4.59 | <0.0001 |
| L Lateral OFC                                 | -38 | 31  | -21 | 4.29 | 0.0001  |
| L Hippocampus                                 | -14 | -22 | -3  | 4.2  | 0.0045  |

**Interval 2                    Order Effects**

|                              |     |     |     |       |         |
|------------------------------|-----|-----|-----|-------|---------|
| R/L Lateral Occipital        | 30  | -50 | -12 | -4.99 | <0.0001 |
| R Inferior Parietal          | 51  | 32  | 7   | -4.58 | 0.0002  |
| L Middle Temporal Gyrus      | -48 | -78 | 20  | -4.46 | 0.0004  |
| R Middle Temporal Gyrus      | -36 | -54 | -12 | -4.39 | <0.0001 |
| R Fusiform                   | 30  | -68 | 26  | -4.26 | <0.0001 |
| R Pars Triangularis          | 50  | 12  | 17  | -4.2  | <0.0001 |
| L Lateral Occipital          | 32  | 27  | -16 | -4.16 | 0.0302  |
| L Fusiform                   | -20 | -86 | 2   | 4.47  | <0.0001 |
| R Inferior/Superior Parietal | 59  | -48 | 40  | 4.28  | <0.0001 |
| R Precentral Gyrus           | -63 | -39 | 8   | 4.11  | 0.0078  |
| R Lateral OFC                | 50  | -38 | -2  | 3.43  | 0.0089  |
